# Supplementary material
Source: PubMed Central journal article supplement (PMC8608731)
Supplement: NIHMS1726140-supplement-1.pdf [file NIHMS1726140-supplement-1.pdf]

**Appendix**  
**Association of State Gestational Age Limit Abortion Laws With Infant Mortality**  
**Karletsos et al.**

**Appendix Table 1.** Associations Between Gestational Age Laws and Infant Transport Accident Mortality (Deaths Per 1,000 Live Births)<sup>a</sup>

|                                     | <b>Total population</b> | <b>Non-Hispanic Black</b> | <b>Hispanic</b>   | <b>Non-Hispanic White</b> |
|-------------------------------------|-------------------------|---------------------------|-------------------|---------------------------|
| Impact of gestational age limit law | 0.0042                  | -0.0001                   | 0.0005            | 0.0014                    |
| 95% CI                              | (-0.0024, 0.0108)       | (-0.0034, 0.0032)         | (-0.0018, 0.0028) | (-0.0044, 0.0072)         |

<sup>a</sup>Coefficients were calculated using linear regression models (N=663) including state and year fixed effects in addition to all state-level sociodemographic and economic characteristics outlined in Table 1 with SEs clustered at the state level.
